# Supplementary material for: Water-Soluble Visible Light Sensitive Photoinitiating System Based on Charge Transfer Complexes for the 3D Printing of Hydrogels
Source: MDPI journal article supplement (doi:10.3390/polym13183195), 2021-09-21
Supplement: s1 [file s1]

Supplementary Material

# Water-Soluble Visible Light Sensitive Photoinitiating System Based on Charge Transfer Complexes for the 3D Printing of Hydrogels

Hong Chen <sup>1,2</sup>, Mehdi Vahdati <sup>1,2</sup>, Pu Xiao <sup>3,\*</sup>, Frédéric Dumur <sup>4,\*</sup> and Jacques Lalevée <sup>1,2,\*</sup>

<sup>1</sup> Université de Haute-Alsace, CNRS, IS2M UMR 7361, F-68100 Mulhouse, France;

hong.chen@uha.fr (H.C.); mehdi.vahdati@uha.fr (M.V.)

<sup>2</sup> Université de Strasbourg, France

<sup>3</sup> Research School of Chemistry, Australian National University, Canberra ACT 2601, Australia

<sup>4</sup> Aix Marseille Univ, CNRS, ICR UMR 7273, F-13397 Marseille, France

\* Correspondence: pu.xiao@anu.edu.au (P.X.); frederic.dumur@univ-amu.fr (F.D.); jacques.lalevee@uha.fr (J.L.)

**Citation:** Chen, H.; Vahdati, M.; Xiao, P.; Dumur, F.; Lalevée, J. Water-Soluble Visible Light Sensitive Photoinitiating System Based on Charge Transfer Complexes for the 3D printing of Hydrogels. *Polymers* **2021**, *13*, 3195.

<https://doi.org/10.3390/polym13183195>

Academic Editor: Chin-San Wu

Received: 10 August 2021

Accepted: 18 September 2021

Published: 21 September 2021

**Publisher's Note:** MDPI stays neutral with regard to jurisdictional claims in published maps and institutional affiliations.

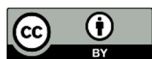

**Copyright:** © 2021 by the authors. Licensee MDPI, Basel, Switzerland. This article is an open access article distributed under the terms and conditions of the Creative Commons Attribution (CC BY) license (<http://creativecommons.org/licenses/by/4.0/>).

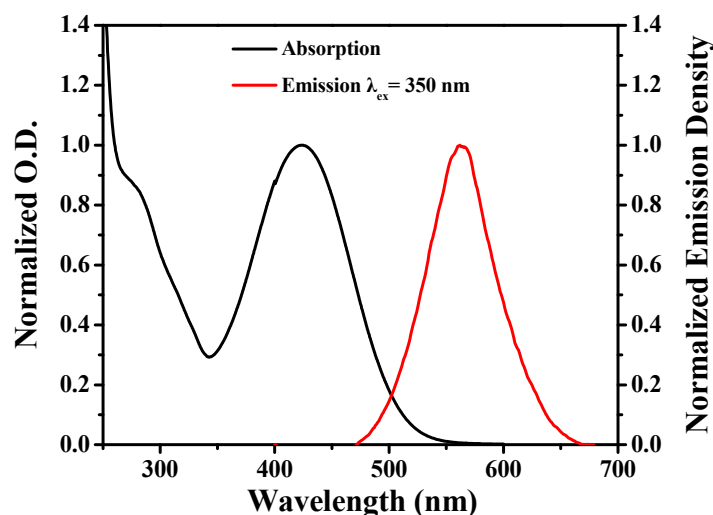

**Figure S1.** The normalized absorption and emission spectrums of [dye-TEA] CTC in water.

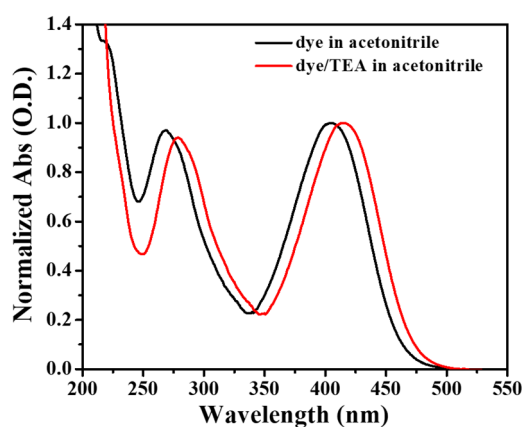

**Figure S2.** The normalized absorption of dye and [dye-TEA] CTC in acetonitrile.

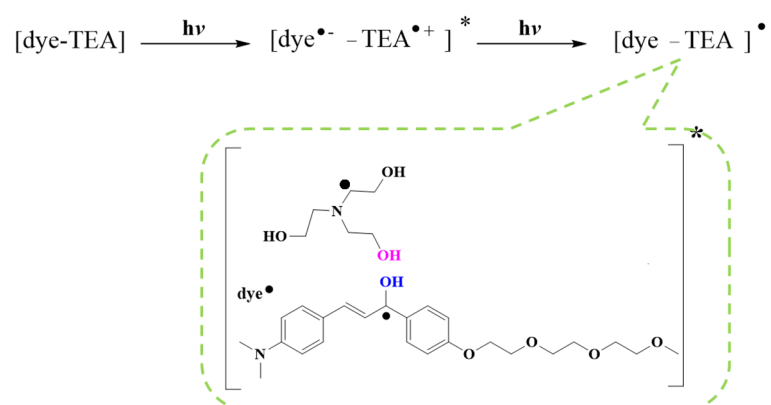

**Figure S3.** The involved mechanism of [dye-TEA] CTC.
